# Supplementary material for: Fgf receptor 3 activation promotes selective growth and expansion of occipitotemporal cortex
Source: PubMed Central journal article supplement (PMC2661882; doi:10.1186/1749-8104-4-4), 2009-02-03

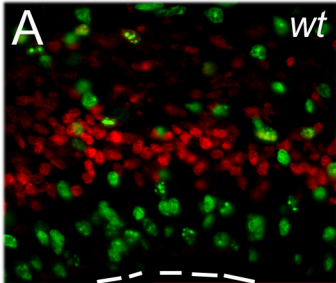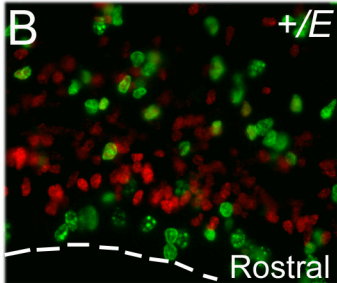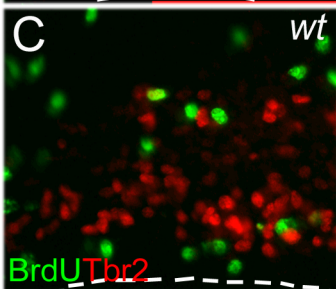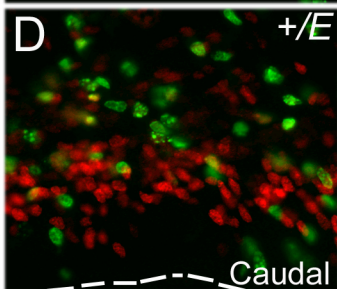

Supplement: 1749-8104-4-4-S1.pdf [file 1749-8104-4-4-S1.pdf]
